# Supplementary material for: Prevalence, Characteristics and Clonal Distribution of Extended-Spectrum β-Lactamase- and AmpC β-Lactamase-Producing Escherichia coli Following the Swine Production Stages, and Potential Risks to Humans
Source: PubMed Central journal article supplement (PMC8334370; doi:10.3389/fmicb.2021.710747), 2021-07-21
Supplement: Image_1.pdf [file Image_1.pdf]

**Supplementary Figure 1. Transferability of the  $\beta$ -lactamase gene, resistance genes, and replicon types in ESBL/AmpC-EC in the conjugation assay.** Colored cells indicate the transfer of genes/plasmids represented by each column in the conjugation assay with *Escherichia coli* J53-Azi<sup>R</sup> strain. The transferability of genes was confirmed by PCR. <sup>a</sup> detected in donor strains but did not transfer; Blank = plasmid replicon or antimicrobial resistance genes were not detected in donor strains
