# Supplementary material for: Prevalence, Characteristics and Clonal Distribution of Extended-Spectrum β-Lactamase- and AmpC β-Lactamase-Producing Escherichia coli Following the Swine Production Stages, and Potential Risks to Humans
Source: PubMed Central journal article supplement (PMC8334370; doi:10.3389/fmicb.2021.710747), 2021-07-21
Supplement: Image_2.pdf [file Image_2.pdf]

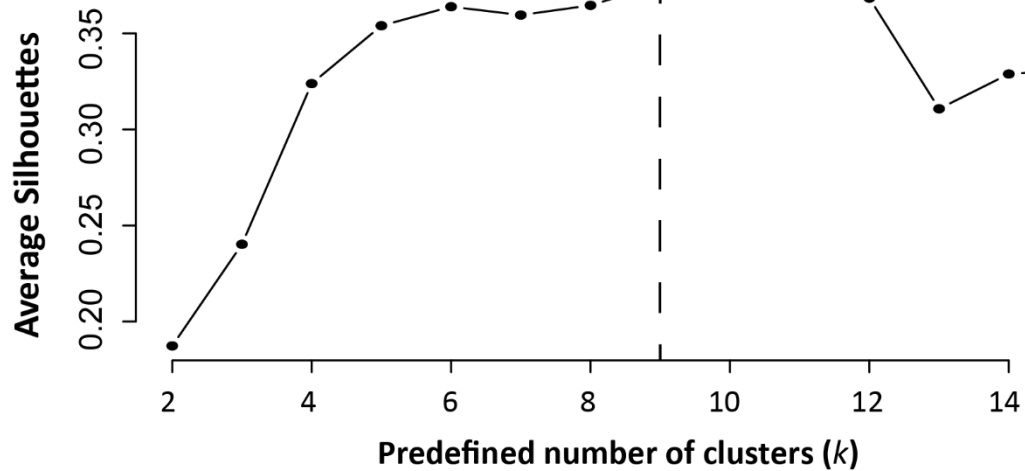

**Supplementary Figure 2. Determination of the best-fit cluster number by average silhouettes method for the  $k$ -means clustering algorithm.** An average silhouette method presumes that the optimal number of clusters  $k$  is the one that maximizes the average silhouette over a range of possible values for  $k$  in the  $k$ -means clustering algorithm.
