# Supplementary material for: Prevalence, Characteristics and Clonal Distribution of Extended-Spectrum β-Lactamase- and AmpC β-Lactamase-Producing Escherichia coli Following the Swine Production Stages, and Potential Risks to Humans
Source: PubMed Central journal article supplement (PMC8334370; doi:10.3389/fmicb.2021.710747), 2021-07-21
Supplement: Image_3.pdf [file Image_3.pdf]

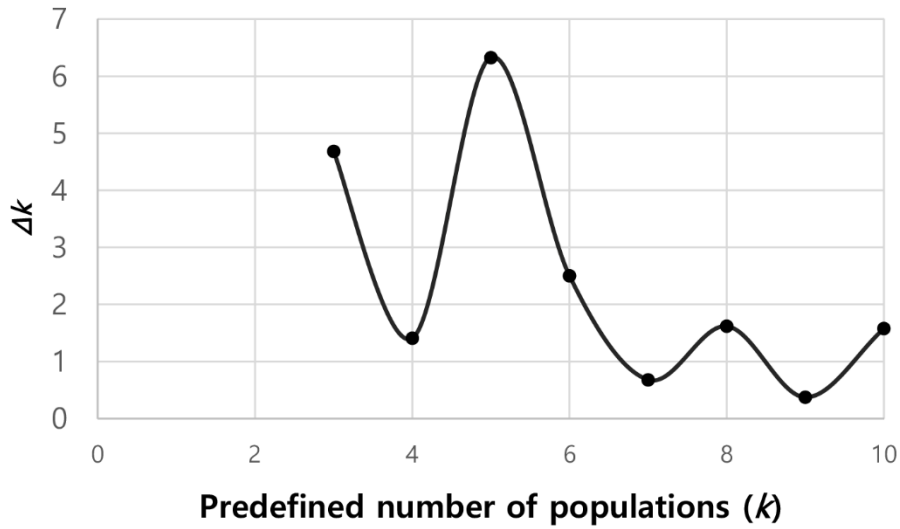

**Supplementary Figure 3. Determination of the best-fit population number using the Bayesian approach for population structure analysis.**  $\Delta k$  is the second-order rate of change of  $k$ . A clear peak shows the most likely value of  $k$  (5) in the population structure analysis.
