# Supplementary material for: Prevalence, Characteristics and Clonal Distribution of Extended-Spectrum β-Lactamase- and AmpC β-Lactamase-Producing Escherichia coli Following the Swine Production Stages, and Potential Risks to Humans
Source: PubMed Central journal article supplement (PMC8334370; doi:10.3389/fmicb.2021.710747), 2021-07-21
Supplement: Table_1.pdf [file Table_1.pdf]

**Supplementary Table 1. Oligonucleotide primers and annealing temperature used in this study.**

| Function                 | Genes                               | Nucleotide sequence         | Amplicon size (bp) | Annealing temp. (°C) | Reference                      |
|--------------------------|-------------------------------------|-----------------------------|--------------------|----------------------|--------------------------------|
| ESBL types               | <i>bla<sub>CTX-M-1</sub></i> group  | F GTTACAATGTGTGAGAAGCAG     | 1,041              | 60                   | (Jouini et al., 2007)          |
|                          |                                     | R CCGTTTCCGCTATTACAAAC      |                    |                      |                                |
|                          | <i>bla<sub>CTX-M-2</sub></i> group  | F CGACGCTACCCCTGCTATT       | 832                | 60                   |                                |
|                          |                                     | R CAGAAACCGTGGGTACGAT       |                    |                      |                                |
|                          | <i>bla<sub>CTX-M-8</sub></i> group  | F GCGCTGGAGAAAAGCAG         | 862                | 60                   |                                |
|                          |                                     | R GGTTTTATCCCCGACAACC       |                    |                      |                                |
|                          | <i>bla<sub>CTX-M-9</sub></i> group  | F GTGACAAAGAGAGTGCAACGG     | 857                | 60                   |                                |
|                          |                                     | R ATGATTCTCGCCGCTGAAGCC     |                    |                      |                                |
|                          | <i>bla<sub>CTX-M-25</sub></i> group | F GCACGATGACATTCCGGG        | 327                | 60                   |                                |
|                          |                                     | R AACCCACGATGTGGGTAGC       |                    |                      |                                |
|                          | <i>bla<sub>CMY</sub></i>            | F AACACACTGATTGCGTCTGAC     | 1,226              | 60                   |                                |
|                          |                                     | R CTGGGCCTCATCGTCAGTTA      |                    |                      |                                |
|                          | <i>bla<sub>SHV</sub></i>            | F TGCCTGTGTATTATCTCCC       | 768                | 54                   |                                |
|                          |                                     | R CGCAGATAAATCACCACAATG     |                    |                      |                                |
| <i>bla<sub>TEM</sub></i> | F TCCGTCATGAGACAATAACC              | 1,057                       | 58                 |                      |                                |
|                          | R ACGCTCAGTGGAAACGAAAAC             |                             |                    |                      |                                |
| <i>bla<sub>OXA</sub></i> | F ACACAATACATCAACTTCGC              | 813                         | 60                 |                      |                                |
|                          | R AGTGTGTTTAGAATGGTGATC             |                             |                    |                      |                                |
| Phylogenetic group       | <i>yjaA</i>                         | F CAAACGTGAAGTGTCAGGAG      | 288                | 55                   | (Clermont et al., 2013)        |
|                          |                                     | R AATGCGTTCCTCAACCTGTG      |                    |                      |                                |
|                          | <i>chuA</i>                         | F ATGGTACCGACGAACCAAC       | 211                | 55                   |                                |
|                          |                                     | R TGCCGCCAGTACCAAAGACA      |                    |                      |                                |
|                          | <i>tspE4.C2</i>                     | F CACTATTTCGTAAGGTCATCC     | 152                | 55                   |                                |
|                          |                                     | R AGTTTATCGCTGCGGGTCCG      |                    |                      |                                |
|                          | <i>AceK.f</i>                       | F AACGCTATTGCCAGCTTGC       | 400                | 55                   |                                |
|                          |                                     | R TCTCCCCATACCGTACGCTA      |                    |                      |                                |
|                          | <i>ArpA1.r</i>                      | F GATTCCATCTTGTCAAAATATGCC  | 301                | 55                   |                                |
|                          |                                     | R GAAAAGAAAAAGAATCCCAAGAG   |                    |                      |                                |
|                          | <i>ArpAgpE.f</i>                    | F AGTTTTATGCCAGTGGGAG       | 219                | 55                   |                                |
|                          |                                     | R TCTGCGCCGGTACGCCC         |                    |                      |                                |
|                          | <i>trpAgpC.1</i>                    | F CGGCGATAAAGACATCTTCAC     | 489                | 55                   |                                |
|                          |                                     | R GCAACGCGGCCCTGGCGGAAG     |                    |                      |                                |
| Virulence factors        | <i>fimH</i>                         | F TGCAGAACGGATAAGCCGTGG     | 508                | 63                   | (Gonzalez Moreno et al., 2020) |
|                          |                                     | R GCAGTCACCTGCCCTCCGGTA     |                    |                      |                                |
|                          | <i>iha</i>                          | F CTGGCGGAGGCTCTGAGATCA     | 827                | 55                   |                                |
|                          |                                     | R TCCTTAAGCTCCCGCGGCTGA     |                    |                      |                                |
|                          | <i>papC</i>                         | F GTGGCAGTATGAGTAATGACCGTTA | 200                | 63                   |                                |
|                          |                                     | R ATATCCTTCTGCAGGGATGCAATA  |                    |                      |                                |
|                          | <i>csgA</i>                         | F ACTCTGACTTGAATATTACC      | 200                | 55                   |                                |
|                          |                                     | R AGATGCAGTCTGGTCAAC        |                    |                      |                                |
|                          | <i>astA</i>                         | F TGCCATCAACACAGTATATCCG    | 102                | 65                   |                                |
|                          |                                     | R ACGGCTTTGTAGTCCTTCCAT     |                    |                      |                                |
|                          | <i>hlyA</i>                         | F AACAAAGATAAGCACTGTTCTGGCT | 1,176              | 63                   |                                |
|                          |                                     | R ACCATATAAGCGGTCATTCCCCTCA |                    |                      |                                |
|                          | <i>aat</i>                          | F CTGGCGAAAGACTGTATCAT      | 629                | 53                   |                                |
|                          |                                     | R CAATGTATAGAAATCCGCTGTT    |                    |                      |                                |
|                          | <i>tsh</i>                          | F ACTATTCTCTGCAGGAAGTC      | 824                | 55                   |                                |
|                          |                                     | R CTCCGATGTTCTGAACGT        |                    |                      |                                |
|                          | <i>pic</i>                          | F AGCCGTTTCCGCAGAAAGCC      | 1,111              | 63                   |                                |
|                          |                                     | R AAATGTCAGTGAACCGACGATTGG  |                    |                      |                                |
| <i>traT</i>              | F GGTGTGGTGGGATGAGCACAG             | 290                         | 60                 |                      |                                |
|                          | R CACGGTTCAGCCATCCCTGAG             |                             |                    |                      |                                |
| <i>ompT</i>              | F ATCTAGCCGAAGAAGGAGGC              | 559                         | 64                 |                      |                                |
|                          | R                                   |                             |                    |                      |                                |

|                          |                     |                          |                            |     |                          |                                |
|--------------------------|---------------------|--------------------------|----------------------------|-----|--------------------------|--------------------------------|
|                          |                     | R                        | CCCGGGTCATAGTGTTTCATC      |     |                          |                                |
|                          | <i>fyuA</i>         | F                        | TGATTAACCCCGCGACGGGAA      | 880 | 63                       | (Gonzalez Moreno et al., 2020) |
|                          |                     | R                        | CGCAGTAGGCACGATGTTGTA      |     |                          |                                |
|                          | <i>iroNe.coli</i>   | F                        | AAGTCAAAGCAGGGGTGCCCG      | 665 | 63                       | (Aazam et al., 2012)           |
|                          |                     | R                        | GACGCCGACATTAAGACGCAG      |     |                          |                                |
| Antimicrobial resistance | <i>catA</i>         | F                        | AGTTGCTCAATGTACCTATAACC    | 547 | 57                       | (Saenz et al., 2004)           |
|                          |                     | R                        | TTGTAATTCATTAAGCATTCTGCC   |     |                          |                                |
|                          | <i>cmlA</i>         | F                        | CCGCCACGGTGTGTTGTTATC      | 698 | 57                       | (Saenz et al., 2004)           |
|                          |                     | R                        | CACCTTGCCTGCCATCATTAG      |     |                          |                                |
|                          | <i>floR</i>         | F                        | TATCTCCTGTCTGTTCCAG        | 399 | 52                       | (Saenz et al., 2004)           |
|                          |                     | R                        | AGAACTCGCCGATCAATG         |     |                          |                                |
|                          | <i>tetA</i>         | F                        | GCTACATCCTGCTTGCCTTC       | 210 | 58                       | (Saenz et al., 2004)           |
|                          |                     | R                        | CATAGATCGCCGTGAAGAG        |     |                          |                                |
|                          | <i>tetB</i>         | F                        | TTGGTTAGGGCAAGTTTTG        | 659 | 56                       | (Saenz et al., 2004)           |
|                          |                     | R                        | GTAATGGGCCAATAACACCG       |     |                          |                                |
|                          | <i>tetD</i>         | F                        | AAACCATTACGGCATTCTGC       | 787 | 60                       | (Saenz et al., 2004)           |
|                          |                     | R                        | GACCGGATACACCATCCATC       |     |                          |                                |
|                          | <i>qnrA</i>         | F                        | ATTTCTCA CGCCAGGATTTG      | 516 | 53                       | (Liao et al., 2015)            |
|                          |                     | R                        | GATCGGCAAAGGTTAGGTCA       |     |                          |                                |
|                          | <i>qnrB</i>         | F                        | GATCGTGAAAGCCAGAAAGG       | 469 | 53                       | (Liao et al., 2015)            |
|                          |                     | R                        | ACGATGCCTGGTAGTTGTCC       |     |                          |                                |
|                          | <i>qnrC</i>         | F                        | GGGTTGTACATTTATTGAATC      | 447 | 50                       | (Liao et al., 2015)            |
|                          |                     | R                        | TCCACTTTACGAGGTTCT         |     |                          |                                |
|                          | <i>qnrS</i>         | F                        | ACGACATTCGTCAACTGCAA       | 417 | 53                       | (Liao et al., 2015)            |
|                          |                     | R                        | TAAATTGGCACCCGTAGGC        |     |                          |                                |
|                          | <i>aac(6)-Ib-cr</i> | F                        | TTGCGATGCTCTATGAGTGGCTA    | 482 | 50                       | (Liao et al., 2015)            |
|                          |                     | R                        | CTCGAATGCCTGGCGTGTTC       |     |                          |                                |
|                          | <i>aac(3)-I</i>     | F                        | ACCTACTCCCAACATCAGCC       | 169 | 60                       | (Saenz et al., 2004)           |
|                          |                     | R                        | ATATAGATCTCACTACGCGC       |     |                          |                                |
|                          | <i>aac(3)-II</i>    | F                        | ACTGTGATGGGATACGCGTC       | 237 | 60                       | (Saenz et al., 2004)           |
|                          |                     | R                        | CTCCGTCAGCGTTTCAGCTA       |     |                          |                                |
|                          | <i>aac(3)-IV</i>    | F                        | CTTCAGGATGGCAAAGTTGGT      | 286 | 60                       | (Saenz et al., 2004)           |
|                          |                     | R                        | TCATCTCGTTCTCCGCTCAT       |     |                          |                                |
|                          | <i>dfrIa</i>        | F                        | GTGAAACTATCACTAATGG        | 474 | 55                       | (Saenz et al., 2004)           |
|                          |                     | R                        | TTAACCCTTTTGCCAGATT        |     |                          |                                |
|                          | <i>dfrIb</i>        | F                        | GAGCAGCTICTITTTAAAGC       | 393 | 60                       | (Saenz et al., 2004)           |
|                          |                     | R                        | TTAGCCCTTTIICCAATTTT       |     |                          |                                |
| <i>dfrII</i>             | F                   | GATCACGTGCGCAAGAAATC     | 141                        | 50  | (Saenz et al., 2004)     |                                |
|                          | R                   | AAGCGCAGCCACAGGATAAAT    |                            |     |                          |                                |
| <i>dfrVII</i>            | F                   | TTGAAAATTTCAATTGATT      | 474                        | 55  | (Saenz et al., 2004)     |                                |
|                          | R                   | TTAGCCTTTTTTCCAAATCT     |                            |     |                          |                                |
| <i>dfrXII</i>            | F                   | GGTGS GCAGAAGATTTTTCGC   | 319                        | 60  | (Saenz et al., 2004)     |                                |
|                          | R                   | TGGGAAGAAGGCGTACCCTC     |                            |     |                          |                                |
| Replicon types           | IncHI1              | F                        | GGAGCGATGGATTACTTCAGTAC    | 471 | 60                       | (Carattoli et al., 2005)       |
|                          |                     | R                        | TGCCGTTTCACCTCGTGAGTA      |     |                          |                                |
|                          | IncHI2              | F                        | TTTCTCCTGAGTCACCTGTTAAACAC | 644 | 60                       | (Carattoli et al., 2005)       |
|                          |                     | R                        | GGCTCACTACCGTTGTCATCCT     |     |                          |                                |
|                          | IncII-ly            | F                        | CGAAAAGCCGGACGGCAGAA       | 139 | 60                       | (Carattoli et al., 2005)       |
|                          |                     | R                        | TCGTCTGTTCCGCCAAGTTCGT     |     |                          |                                |
|                          | IncI2               | F                        | CTGTGCGCATGTCTGTCTC        | 553 | 55                       | (Lv et al., 2013)              |
|                          |                     | R                        | CTGGCTACCAGTTGCTCTAA       |     |                          |                                |
|                          | IncX1               | F                        | GCTTAGACTTGTGTTTATCGTT     | 461 | 62                       | (Johnson et al., 2012)         |
|                          |                     | R                        | TAATGATCCTCAGCATGTGAT      |     |                          |                                |
|                          | IncX2               | F                        | GCGAAGAAATCAAAGAAGCTA      | 678 | 63                       | (Johnson et al., 2012)         |
|                          |                     | R                        | TGTTGAATGCCGTTCTTGTCCAG    |     |                          |                                |
|                          | IncX3               | F                        | GTTTTCTCCACGCCCTTGTTCA     | 351 | 63                       | (Johnson et al., 2012)         |
|                          |                     | R                        | CTTTGTGCTTGGCTATCATAA      |     |                          |                                |
|                          | IncX4               | F                        | AGCAAACAGGGAAAGGAGAAGACT   | 569 | 62                       | (Johnson et al., 2012)         |
|                          |                     | R                        | TACCCCAAATCGTAACCTG        |     |                          |                                |
| IncL/M                   | F                   | GGATGAAAATATCAGCATCTGAAG | 785                        | 60  | (Carattoli et al., 2005) |                                |

---

|         |   |                            |     |    |                          |
|---------|---|----------------------------|-----|----|--------------------------|
|         | R | CTGCAGGGGCGATTCTTTAGG      |     |    |                          |
| IncFIA  | F | CCATGCTGGTTCTAGAGAAGGTG    | 462 | 60 | (Carattoli et al., 2005) |
|         | R | GTATATCCTTACTGGCTTCCGCAG   |     |    |                          |
| IncFIB  | F | GGAGTTCTGACACACGATTTTCTG   | 702 | 63 | (Carattoli et al., 2005) |
|         | R | CTCCCGTCGCTTCAGGGCATT      |     |    |                          |
| IncFIC  | F | GTGAACTGGCAGATGAGGAAGG     | 262 | 60 | (Carattoli et al., 2005) |
|         | R | TTCTCCTCGTCGCCAAACTAGAT    |     |    |                          |
| IncFIIs | F | CTGTGTAAGCTGATGGC          | 270 | 60 | (Carattoli et al., 2005) |
|         | R | CTCTGCCACAACTTCAGC         |     |    |                          |
| IncA/C  | F | GAGAACCAAAGACAAAGACCTGGA   | 465 | 60 | (Carattoli et al., 2005) |
|         | R | ACGACAAACCTGAATTGCCTCCTT   |     |    |                          |
| IncP    | F | CTATGGCCCTGCAAACGCGCCAGAAA | 534 | 60 | (Carattoli et al., 2005) |
|         | R | TCACGCGCCAGGGCGCAGCC       |     |    |                          |
| IncK    | F | GCGGTCCGGAAAGCCAGAAAAC     | 160 | 60 | (Carattoli et al., 2005) |
|         | R | TCTTTCACGAGCCCGCCAAA       |     |    |                          |
| IncB/O  | F | GCGGTCCGGAAAGCCAGAAAAC     | 159 | 60 | (Carattoli et al., 2005) |
|         | R | TCTGCGTTCCGCCAAGTTCGA      |     |    |                          |
| IncN    | F | GTCTAACGAGCTTACCGAAG       | 559 | 55 | (Carattoli et al., 2005) |
|         | R | GTTTCAACTCTGCCAAGTTC       |     |    |                          |

---

## References

- Aazam, K., Hassan, M., and Mahbobe, M. (2012). Detection of uropathogenic *Escherichia coli* virulence factors in patients with urinary tract infections in Iran. *African Journal of Microbiology Research* 6(39), 6811-6816. doi: 10.5897/ajmr12.1462.
- Carattoli, A., Bertini, A., Villa, L., Falbo, V., Hopkins, K.L., and Threlfall, E.J. (2005). Identification of plasmids by PCR-based replicon typing. *J Microbiol Methods* 63(3), 219-228. doi: 10.1016/j.mimet.2005.03.018.
- Clermont, O., Christenson, J.K., Denamur, E., and Gordon, D.M. (2013). The Clermont *Escherichia coli* phylo-typing method revisited: improvement of specificity and detection of new phylogroups. *Environ Microbiol Rep* 5(1), 58-65. doi: 10.1111/1758-2229.12019.
- Gonzalez Moreno, C., Torres Luque, A., Oliszewski, R., Rosa, R.J., and Otero, M.C. (2020). Characterization of native *Escherichia coli* populations from bovine vagina of healthy heifers and cows with postpartum uterine disease. *PLoS One* 15(6), e0228294. doi: 10.1371/journal.pone.0228294.
- Johnson, T.J., Bielak, E.M., Fortini, D., Hansen, L.H., Hasman, H., Debroy, C., et al. (2012). Expansion of the IncX plasmid family for improved identification and typing of novel plasmids in drug-resistant Enterobacteriaceae. *Plasmid* 68(1), 43-50. doi: 10.1016/j.plasmid.2012.03.001.
- Jouini, A., Vinue, L., Slama, K.B., Saenz, Y., Klibi, N., Hammami, S., et al. (2007). Characterization of CTX-M and SHV extended-spectrum beta-lactamases and associated resistance genes in *Escherichia coli* strains of food samples in Tunisia. *J Antimicrob Chemother* 60(5), 1137-1141. doi: 10.1093/jac/dkm316.
- Liao, X.P., Xia, J., Yang, L., Li, L., Sun, J., Liu, Y.H., et al. (2015). Characterization of CTX-M-14-producing *Escherichia coli* from food-producing animals. *Front Microbiol* 6, 1136. doi: 10.3389/fmicb.2015.01136.
- Lv, L., Partridge, S.R., He, L., Zeng, Z., He, D., Ye, J., et al. (2013). Genetic characterization of IncI2 plasmids carrying blaCTX-M-55 spreading in both pets and food animals in China. *Antimicrob Agents Chemother* 57(6), 2824-2827. doi: 10.1128/AAC.02155-12.
- Moyo, S.J., Maselle, S.Y., Matee, M.I., Langeland, N., and Mylvaganam, H. (2007). Identification of diarrheagenic *Escherichia coli* isolated from infants and children in Dar es Salaam, Tanzania. *BMC Infect Dis* 7, 92. doi: 10.1186/1471-2334-7-92.
- Muller, D., Greune, L., Heusipp, G., Karch, H., Fruth, A., Tschape, H., et al. (2007). Identification of unconventional intestinal pathogenic *Escherichia coli* isolates expressing intermediate virulence factor profiles by using a novel single-step multiplex PCR. *Appl Environ Microbiol* 73(10), 3380-3390. doi: 10.1128/AEM.02855-06.
- Saenz, Y., Brinas, L., Dominguez, E., Ruiz, J., Zarazaga, M., Vila, J., et al. (2004). Mechanisms of resistance in multiple-antibiotic-resistant *Escherichia coli* strains of human, animal, and food origins. *Antimicrob Agents Chemother* 48(10), 3996-4001. doi: 10.1128/AAC.48.10.3996-4001.2004.
- Zhi, S., Banting, G., Li, Q., Edge, T.A., Topp, E., Sokurenko, M., et al. (2016). Evidence of Naturalized Stress-Tolerant Strains of *Escherichia coli* in Municipal Wastewater Treatment Plants. *Appl Environ Microbiol* 82(18), 5505-5518. doi: 10.1128/AEM.00143-16.
