# Supplementary material for: Prevalence, Characteristics and Clonal Distribution of Extended-Spectrum β-Lactamase- and AmpC β-Lactamase-Producing Escherichia coli Following the Swine Production Stages, and Potential Risks to Humans
Source: PubMed Central journal article supplement (PMC8334370; doi:10.3389/fmicb.2021.710747), 2021-07-21
Supplement: Table_2.pdf [file Table_2.pdf]

**Supplementary Table 2. Comparison of the prevalence of plasmid-mediated antimicrobial resistance genes between ESBL/AmpC-EC and non-ESBL/AmpC-EC isolates.**

| Antibiotic classes           | Antibiotic resistance gene                             | Prevalence (%) of.            |                                  | OR<br>(95% CI)       | <i>p</i> - value  |
|------------------------------|--------------------------------------------------------|-------------------------------|----------------------------------|----------------------|-------------------|
|                              |                                                        | ESBL/AmpC<br>-EC<br>(n = 161) | non-ESBL/AmpC<br>-EC<br>(n = 81) |                      |                   |
| Phenicol                     | <i>catA</i>                                            | 4.4                           | 0.0                              | 7.9<br>(0.45-140.30) | 0.16 <sup>†</sup> |
|                              | <i>cml</i>                                             | 15.5                          | 25.9                             | 0.5<br>(0.10-2.89)   | 0.46              |
|                              | <i>floR</i>                                            | 68.8                          | 61.7                             | 1.4<br>(0.54-3.46)   | 0.51              |
|                              | <i>catA, cmlA, or floR</i>                             | 80.1                          | 70.4                             | 1.8<br>(0.48-6.53)   | 0.39              |
| Tetracycline                 | <i>tetA</i>                                            | 52.8                          | 56.8                             | 0.9<br>(0.24-3.01)   | 0.80              |
|                              | <i>tetB</i>                                            | 22.4                          | 14.8                             | 1.7<br>(0.60-4.60)   | 0.33              |
|                              | <i>tetD</i>                                            | 3.7                           | 0.0                              | 6.8<br>(0.38-122.47) | 0.19 <sup>†</sup> |
|                              | <i>tetA, tetB, or tetD</i>                             | 69.6                          | 71.6                             | 0.9<br>(0.28-3.14)   | 0.91              |
| Quinolone                    | <i>qnrA</i>                                            | 0.0                           | 0.0                              | -                    | -                 |
|                              | <i>qnrB</i>                                            | 0.6                           | 2.5                              | 0.3<br>(0.02-2.84)   | 0.26              |
|                              | <i>qnrC</i>                                            | 0.0                           | 0.0                              | -                    | -                 |
|                              | <i>qnrS</i>                                            | 14.3                          | 19.8                             | 0.7<br>(0.10-4.52)   | 0.69              |
|                              | <i>aac(6)-cr-Ib</i>                                    | 0.0                           | 0.0                              | -                    | -                 |
|                              | <i>qnrA, qnrB, qnrC,<br/>qnrS,<br/>or aac(6)-cr-Ib</i> | 14.3                          | 22.2                             | 0.6<br>(0.09-3.99)   | 0.58              |
| Aminoglycoside               | <i>aac(3)-I</i>                                        | 0.0                           | 0.0                              | -                    | -                 |
|                              | <i>aac(3)-II</i>                                       | 19.3                          | 3.7                              | 6.2<br>(1.25-30.70)  | 0.03*             |
|                              | <i>aac(3)-IV</i>                                       | 8.1                           | 1.2                              | 7.0<br>(0.61-81.36)  | 0.12              |
|                              | <i>aac(3)-I, II, or IV</i>                             | 23.6                          | 4.9                              | 5.9<br>(1.36-25.98)  | 0.02*             |
| Sulfonamide/<br>Trimethoprim | <i>dfrIa</i>                                           | 1.2                           | 7.3                              | 0.2<br>(0.05-0.52)   | < 0.01*           |
|                              | <i>dfrIb</i>                                           | 0.0                           | 0.0                              | -                    | -                 |
|                              | <i>dfrII</i>                                           | 0.0                           | 0.0                              | -                    | -                 |
|                              | <i>dfrVII</i>                                          | 0.0                           | 0.0                              | -                    | -                 |

|                                       |      |      |                    |      |
|---------------------------------------|------|------|--------------------|------|
| <i>dfrXII</i>                         | 19.9 | 28.1 | 0.6<br>(0.17-2.26) | 0.47 |
| <i>dfrIa, Ib, II, VII, or<br/>XII</i> | 21.1 | 32.9 | 0.5<br>(0.16-1.80) | 0.31 |

---

CI, Confidence interval; OR, Odds ratio.

Statistically significant (\* $p < 0.05$ , GEE; † $p < 0.05$ , Chi-square test)
