# Supplementary material for: Prevalence, Characteristics and Clonal Distribution of Extended-Spectrum β-Lactamase- and AmpC β-Lactamase-Producing Escherichia coli Following the Swine Production Stages, and Potential Risks to Humans
Source: PubMed Central journal article supplement (PMC8334370; doi:10.3389/fmicb.2021.710747), 2021-07-21
Supplement: Table_3.pdf [file Table_3.pdf]

**Supplementary Table 3. Distributions of ST and phylogroup for each farm and production stage combination.**

|                    |                                 | Clone type             |                       |                       |                       |                      |                       |
|--------------------|---------------------------------|------------------------|-----------------------|-----------------------|-----------------------|----------------------|-----------------------|
|                    |                                 | No. of isolate (%)     |                       |                       |                       |                      |                       |
| Farm A<br>(n = 24) | Stage 1 <sup>a</sup><br>(n = 5) | ST48-A<br>3 (60.0)     | ST5229-B1<br>2 (40.0) |                       |                       |                      |                       |
|                    | Stage 2 <sup>b</sup><br>(n = 7) | ST641-B1<br>2 (28.6)   | ST5229-B1<br>1 (14.3) | ST23-A<br>2 (28.6)    | ST7203-A<br>1 (14.3)  | ST205-B1<br>1 (14.3) |                       |
|                    | Stage 3 <sup>c</sup><br>(n = 9) | ST3944-A<br>2 (22.2)   | ST75-B1<br>1 (11.1)   | ST5229-B1<br>1 (11.1) | ST4014-B1<br>1 (11.1) | ST215-A<br>2 (22.2)  | ST2628-B1<br>2 (22.2) |
|                    | Stage 4 <sup>d</sup><br>(n = 3) | ST75-B1<br>1 (33.3)    | ST767-B1<br>1 (33.3)  | ST10-A<br>1 (33.3)    |                       |                      |                       |
| Farm B<br>(n = 23) | Stage 1<br>(n = 5)              | ST101-B1<br>3 (60.0)   | ST3076-B1<br>1 (20.0) | ST376-B1<br>1 (20.0)  |                       |                      |                       |
|                    | Stage 2<br>(n = 8)              | ST101-B1<br>6 (75.0)   | ST3076-B1<br>1 (12.5) | ST641-B1<br>1 (12.5)  |                       |                      |                       |
|                    | Stage 3<br>(n = 8)              | ST101-B1<br>5 (62.5)   | ST641-B1<br>1 (12.5)  | ST953-A<br>1 (12.5)   | ST218-A<br>1 (12.5)   |                      |                       |
|                    | Stage 4<br>(n = 2)              | ST3076-B1<br>1 (50.0)  | ST3944-A<br>1 (50.0)  |                       |                       |                      |                       |
| Farm C<br>(n = 15) | Stage 1<br>(n = 3)              | ST75-B1<br>2 (66.7)    | ST1642-B1<br>1 (33.3) |                       |                       |                      |                       |
|                    | Stage 2<br>(n = 5)              | ST75-B1<br>3 (60.0)    | ST2628-B1<br>1 (20.0) | ST744-A<br>1 (20.0)   |                       |                      |                       |
|                    | Stage 3<br>(n = 5)              | ST75-B1<br>3 (60.0)    | ST2628-B1<br>1 (20.0) | ST744-A<br>1 (20.0)   |                       |                      |                       |
|                    | Stage 4<br>(n = 2)              | ST2628-B1<br>2 (100.0) |                       |                       |                       |                      |                       |
| Farm D<br>(n = 15) | Stage 1<br>(n = 3)              | ST457-F<br>1 (33.3)    | ST5696-B1<br>1 (33.3) | ST1642-B1<br>1 (33.3) |                       |                      |                       |
|                    | Stage 2<br>(n = 7)              | ST101-B1<br>1 (14.3)   | ST457-F<br>6 (85.7)   |                       |                       |                      |                       |
|                    | Stage 3<br>(n = 4)              | ST101-B1<br>2 (50.0)   | ST10-A<br>2 (50.0)    |                       |                       |                      |                       |
|                    | Stage 4<br>(n = 1)              | ST75-B1<br>1 (100.0)   |                       |                       |                       |                      |                       |

|                    |                    | Clone type            |                     |                       |
|--------------------|--------------------|-----------------------|---------------------|-----------------------|
|                    |                    | No. of isolate (%)    |                     |                       |
| Farm E<br>(n = 18) | Stage 1<br>(n = 5) | ST101-B1<br>1 (20.0)  | ST457-F<br>2 (40.0) | ST410-A<br>2 (40.0)   |
|                    | Stage 2<br>(n = 7) | ST457-F<br>5 (71.4)   | ST75-B1<br>1 (14.3) | ST12-B2<br>1 (14.3)   |
|                    | Stage 3<br>(n = 3) | ST101-B1<br>1 (33.3)  | ST457-F<br>1 (33.3) | ST3285-B1<br>1 (33.3) |
|                    | Stage 4<br>(n = 3) | ST101-B1<br>2 (66.7)  | ST457-F<br>1 (33.3) |                       |
| Farm F<br>(n = 16) | Stage 1<br>(n = 6) | ST224-B1<br>2 (33.3)  | ST457-F<br>3 (50.0) | ST1011-E<br>1 (16.7)  |
|                    | Stage 2<br>(n = 5) | ST224-B1<br>3 (60.0)  | ST457-F<br>2 (40.0) |                       |
|                    | Stage 3<br>(n = 3) | ST224-B1<br>3 (100.0) |                     |                       |
|                    | Stage 4<br>(n = 2) | ST224-B1<br>1 (50.0)  | ST457-F<br>1 (50.0) |                       |
| Farm G<br>(n = 15) | Stage 1<br>(n = 4) | ST75-B1<br>4 (100.0)  |                     |                       |
|                    | Stage 2<br>(n = 1) | ST101-B1<br>1 (100.0) |                     |                       |
|                    | Stage 3<br>(n = 7) | ST101-B1<br>6 (85.7)  | ST75-B1<br>1 (14.3) |                       |
|                    | Stage 4<br>(n = 3) | ST101-B1<br>3 (100.0) |                     |                       |
| Farm H<br>(n = 6)  | Stage 1<br>(n = 4) | ST224-B1<br>2 (50.0)  | ST648-F<br>2 (50.0) |                       |
|                    | Stage 2<br>(n = 2) | ST648-F<br>2 (100.0)  |                     |                       |
|                    | Stage 3<br>(n = 0) |                       |                     |                       |
|                    | Stage 4<br>(n = 0) |                       |                     |                       |
| Farm I<br>(n = 4)  | Stage 1<br>(n = 1) | ST617-A<br>1 (100.0)  |                     |                       |
|                    | Stage 2<br>(n = 2) | ST617-A<br>2 (100.0)  |                     |                       |
|                    | Stage 3<br>(n = 0) |                       |                     |                       |
|                    | Stage 4<br>(n = 1) | ST617-A<br>1 (100.0)  |                     |                       |

Stage 1<sup>a</sup>, Weaning piglets; Stage 2<sup>b</sup>, Growing pigs; Stage 3<sup>c</sup>, Finishing pigs, Stage 4<sup>d</sup>, Pregnant sows.
