# Supplementary material for: Prevalence, Characteristics and Clonal Distribution of Extended-Spectrum β-Lactamase- and AmpC β-Lactamase-Producing Escherichia coli Following the Swine Production Stages, and Potential Risks to Humans
Source: PubMed Central journal article supplement (PMC8334370; doi:10.3389/fmicb.2021.710747), 2021-07-21
Supplement: Table_4.pdf [file Table_4.pdf]

**Supplementary Table 4. Clonal population distribution of swine ESBL-EC isolates for each MLST sequence type.**

| CC –<br>Phylogenetic group<br>(No. of isolates) | ST - Phylogenetic<br>group | No. of isolates in cluster |           |           |           |           | Total no. |
|-------------------------------------------------|----------------------------|----------------------------|-----------|-----------|-----------|-----------|-----------|
|                                                 |                            | 1                          | 2         | 3         | 4         | 5         |           |
| CC101-B1 (37)                                   | ST101-B1                   | 10                         | 19        |           |           | 2         | 31        |
|                                                 | ST5229-B1                  |                            | 3         |           |           | 1         | 4         |
|                                                 | ST5696-B1                  | 1                          |           |           |           |           | 1         |
|                                                 | ST4014-B1                  |                            |           |           |           | 1         | 1         |
| CC10-A (13)                                     | ST10-A                     |                            |           |           | 3         |           | 3         |
|                                                 | ST215-A                    |                            |           |           | 2         |           | 2         |
|                                                 | ST48-A                     |                            |           |           | 3         |           | 3         |
|                                                 | ST617-A                    |                            |           |           | 4         |           | 4         |
|                                                 | ST218-A                    |                            |           |           | 1         |           | 1         |
| CC23-A (4)                                      | ST23-A                     |                            |           |           | 2         |           | 2         |
|                                                 | ST410-A                    |                            |           |           | 2         |           | 2         |
| CC648-F (4)                                     | ST648-F                    |                            |           | 4         |           |           | 4         |
| CC86-B1 (4)                                     | ST641-B1                   |                            | 4         |           |           |           | 4         |
| CC205-B1 (1)                                    | ST205-B1                   |                            |           |           |           | 1         | 1         |
| CC20-B1 (1)                                     | ST376-B1                   | 1                          |           |           |           |           | 1         |
| CC12-B2 (1)                                     | ST12-B2                    |                            |           | 1         |           |           | 1         |
| Total                                           | ST457-F                    |                            |           | 22        |           |           | 22        |
|                                                 | ST75-B1                    | 15                         | 1         |           |           | 1         | 17        |
|                                                 | ST224-B1                   |                            |           |           |           | 11        | 11        |
|                                                 | ST2628-B1                  | 5                          |           |           |           | 1         | 6         |
|                                                 | ST3944-A                   |                            |           |           | 3         |           | 3         |
|                                                 | ST3076-B1                  |                            |           |           |           | 3         | 3         |
|                                                 | ST744-A                    |                            |           |           | 2         |           | 2         |
|                                                 | ST1642-B1                  |                            |           |           |           | 2         | 2         |
|                                                 | ST3285-B1                  | 1                          |           |           |           |           | 1         |
|                                                 | ST1011-E                   |                            |           |           |           | 1         | 1         |
|                                                 | ST7203-A                   |                            |           |           | 1         |           | 1         |
|                                                 | ST953-A                    | 1                          |           |           |           |           | 1         |
|                                                 | ST767-B1                   |                            |           |           |           | 1         | 1         |
|                                                 | NT-B1                      |                            | 1         |           |           |           | 1         |
|                                                 | NT-A                       |                            |           |           | 1         |           | 1         |
|                                                 | <b>Total</b>               |                            | <b>34</b> | <b>28</b> | <b>27</b> | <b>24</b> | <b>25</b> |

CC, Clonal complex; ST, Sequence type; NT, non-typable.
